# Supplementary material for: Black carbon, particle number concentration and nitrogen oxide emission factors of random in-use vehicles measured with the on-road chasing method
Source: Copernicus journal article supplement (doi:10.5194/acp-15-11011-2015), 2015-10-05
Supplement: Supplementary file 1 [file acp-15-11011-2015-supplement.pdf]

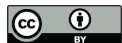

*Supplement of*

## **Black carbon, particle number concentration and nitrogen oxide emission factors of random in-use vehicles measured with the on-road chasing method**

**I. Ježek et al.**

*Correspondence to:* I. Ježek ([irena.jezek@aerosol.si](mailto:irena.jezek@aerosol.si)) and G. Močnik ([grisa.mocnik@aerosol.si](mailto:grisa.mocnik@aerosol.si))

The copyright of individual parts of the supplement might differ from the CC-BY 3.0 licence.

## 1 **Supplementary material S1 – BC, NO<sub>x</sub> and PN formation in combustion engines**

2 NO<sub>x</sub> and BC do not have the same formation process in the engine: while NO<sub>x</sub> is formed in  
3 fuel lean conditions and at high temperatures, BC is formed in fuel rich conditions. Most of  
4 the NO<sub>x</sub> in the engine is formed by the Zeldovich mechanism, where NO is formed from  
5 atmospheric nitrogen (and its destruction) (Heywood, 1988). Soot (or BC) formation does not  
6 have as clear a formation path. According to Xi and Zhong, 2006, the soot formation steps  
7 can be summarized as the: “(1) formation of molecular precursors of soot, (2) nucleation or  
8 inception of particles from heavy polycyclic aromatic hydrocarbon molecules, (3) mass  
9 growth of particles through the addition of gas phase molecules, (4) coagulation via reactive  
10 particle-particle collisions, (5) carbonization of particulate material, and, finally, (6) oxidation  
11 of polycyclic aromatic hydrocarbons and soot particles”.

12 In gasoline engines, the fuel and air are mixed before they are injected in the combustion  
13 chamber: the mix is homogenous and the engine can smoothly operate close to stoichiometric  
14 or slightly fuel-rich mixture. In fuel rich conditions, hydrocarbon (HC) and carbon monoxide  
15 (CO) formation is high, and soot emissions can also occur; in lean to stoichiometric  
16 conditions, NO formation increases. Because engines operate in different modes, several (and  
17 different) emission control techniques are necessary to reduce all pollutants. The reason diesel  
18 engines emit more soot and NO than gasoline engines is because in diesel engines the fuel is  
19 injected in the chamber just before the combustion starts. The fuel-to-air ratio in the mixture  
20 and the combustion temperature are not homogenous, leading to higher NO formation in the  
21 close to-stoichiometric regions and to soot formation in the rich unburned-fuel containing  
22 core of the fuel spray. The majority of soot particles thus formed, can then oxidize in the  
23 presence of unburned oxygen (Heywood, 1988).

24 In diesel vehicles, high soot emissions occur when the relative air-fuel ratio drops to very low  
25 values during the early cycles of a transient event, when the air supply by the compressor  
26 cannot meet the higher fuel flow during load increase; since the fuel pump responds much  
27 faster than the air supply, the combustion efficiency deteriorates and leads to a slow engine  
28 (torque and speed) response and an overshoot in particulate, gaseous, and noise emissions.  
29 There are various delays that affect the transient engine response; in wide spread turbocharged  
30 diesel engines, the poor load acceptance is even worse than in naturally aspired engines  
31 because of the flow and the dynamic inertia of the turbocharger (Tavčar et al., 2011, and  
32 references therein).

1 Particles emitted from the vehicle exhaust consist mainly of highly agglomerated solid  
2 carbonaceous material, ash and volatile organic and Sulphur compounds (Kittelson, 1998).  
3 Carbonaceous soot particles are formed in the combustion process and are mostly found in the  
4 accumulation mode; at the tailpipe where the exhaust dilutes and cools the volatile precursors  
5 may nucleate or adsorb on pre-existing particles (Kittelson et al., 2006). The composition of  
6 the exhaust particles changes under different vehicle load conditions (Ježek et al., 2015;  
7 Kittelson, 1998; Sharma et al., 2005). Unlike particle mass (PM), particle number (PN)  
8 concentration is not conserved in the atmosphere (Kittelson, 1998). The particle number and  
9 size distribution strongly depend on dilution and sampling conditions; the gas to particle  
10 conversion processes, nucleation, condensation and adsorption are non-linear and extremely  
11 sensitive to conditions, thus the on-road emissions are not easy to reproduce in laboratory  
12 (Kittelson et al., 2006). In the atmosphere the residence time for particles in diameter range  
13 0.1-10  $\mu\text{m}$  is about a week and for 10 nm particles about 15 minutes (Harrison et al., 1996). In  
14 this time smaller particles coagulate with larger ones, thus losing their identity as individual  
15 particles but ultimately remaining in the atmosphere for the same amount of time (Harrison et  
16 al., 1996, Kittelson, 1998). Smaller particles – in ultrafine and nanoparticle diameter range,  
17 may be more health hazardous as they can penetrate deeper in to lungs and eventually in the  
18 blood system (Dockery et al., 1993; Kennedy, 2007). With the newest vehicle emission  
19 standard Euro 6 (European Parliament, 2007) also PN emission standards for both gasoline and  
20 diesel cars came in to force.

21

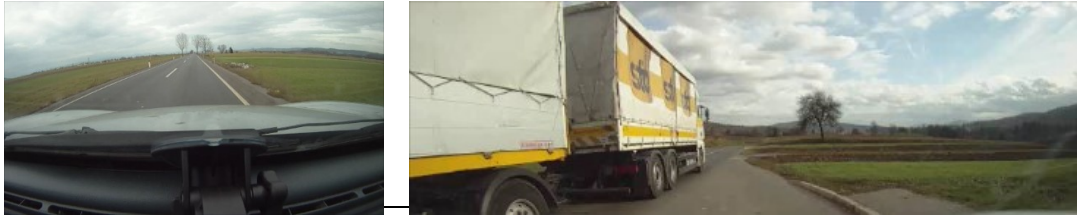

1

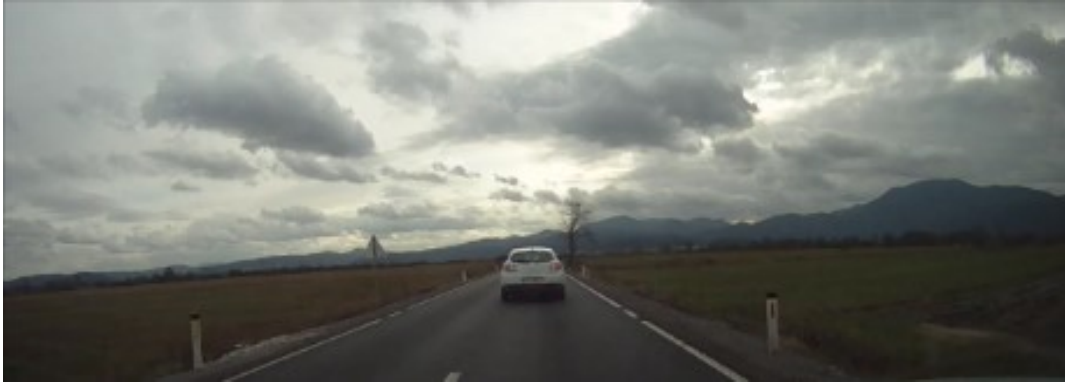

2

3 Figure S1. Photographs from the on-road measurement campaign. The image on the top left is  
4 the background measurement, the top right is the beginning of a chase of a truck with a trailer;  
5 the lower image depicts a car chase.

6

7

## 1 **Supplementary material S2 – additional Eurostat data information**

2 European countries that reported passenger cars fleet composition for year 2011 were:  
3 Belgium, Czech Republic, Germany, Estonia, Ireland, Spain, Croatia, Italy, Cyprus, Latvia,  
4 Lithuania, Hungary, Malta, Netherlands, Poland, Portugal, Romania, Slovenia, Finland,  
5 Sweden, United Kingdom, Norway, Switzerland, Former Yugoslav Republic of Macedonia,  
6 and Turkey

7 Unfortunately this type of Eurostat data was not available for France, which has the third  
8 largest segment (13.3%) of Europe's car fleet (according to Eurostat data for 2010). However,  
9 the ACEA (European Car Manufacturers' Association) reported a similar percentage of diesel  
10 and gasoline cars in the European fleet in their 2012 pocket guide (ACEA, 2012); they  
11 included the following countries: Austria, Belgium, Czech Republic, Denmark, Finland,  
12 France, Germany, Greece, Italy, Latvia, Lithuania, Netherlands, Poland, Romania, Spain,  
13 Sweden and the UK; they report 61.5% of vehicles using gasoline, 35.3% using diesel and  
14 3.2% using other fuel types. The portion of diesel passenger cars in Europe is therefore  
15 around 35%.

16 Countries that reported lorries fleet composition: Malta, Latvia, Estonia, Cyprus, Slovenia,  
17 Croatia, Lithuania, Romania, Finland, Czech Republic, Ireland, Switzerland, Norway,  
18 Portugal, Netherlands, Sweden, Italy, Spain and Germany. Some countries reported different  
19 total numbers of their lorries regarding the age and size segregation. We kept most but  
20 excluded Poland because the difference between the two was over two million.

21

## 1 Supplementary material S3 – additional uncertainty analysis

2 In order to investigate the effect of exhaust dilution on the determination of the EF by  
3 chasing, and to further explain the results of the running integration calculation, we evaluated  
4 the chasing method using tailpipe measurements of CO<sub>2</sub> by PEMS. In this test we wanted to  
5 see how mobile measurements match the direct in-exhaust measurements of the chased  
6 vehicle. From these measurements we calculated the dilution rate (DR) as a ratio of the CO<sub>2</sub>  
7 measured by PEMS and by the chasing instrument (Chang et al., 2009), and compared it to  
8 the calculated BC EF.

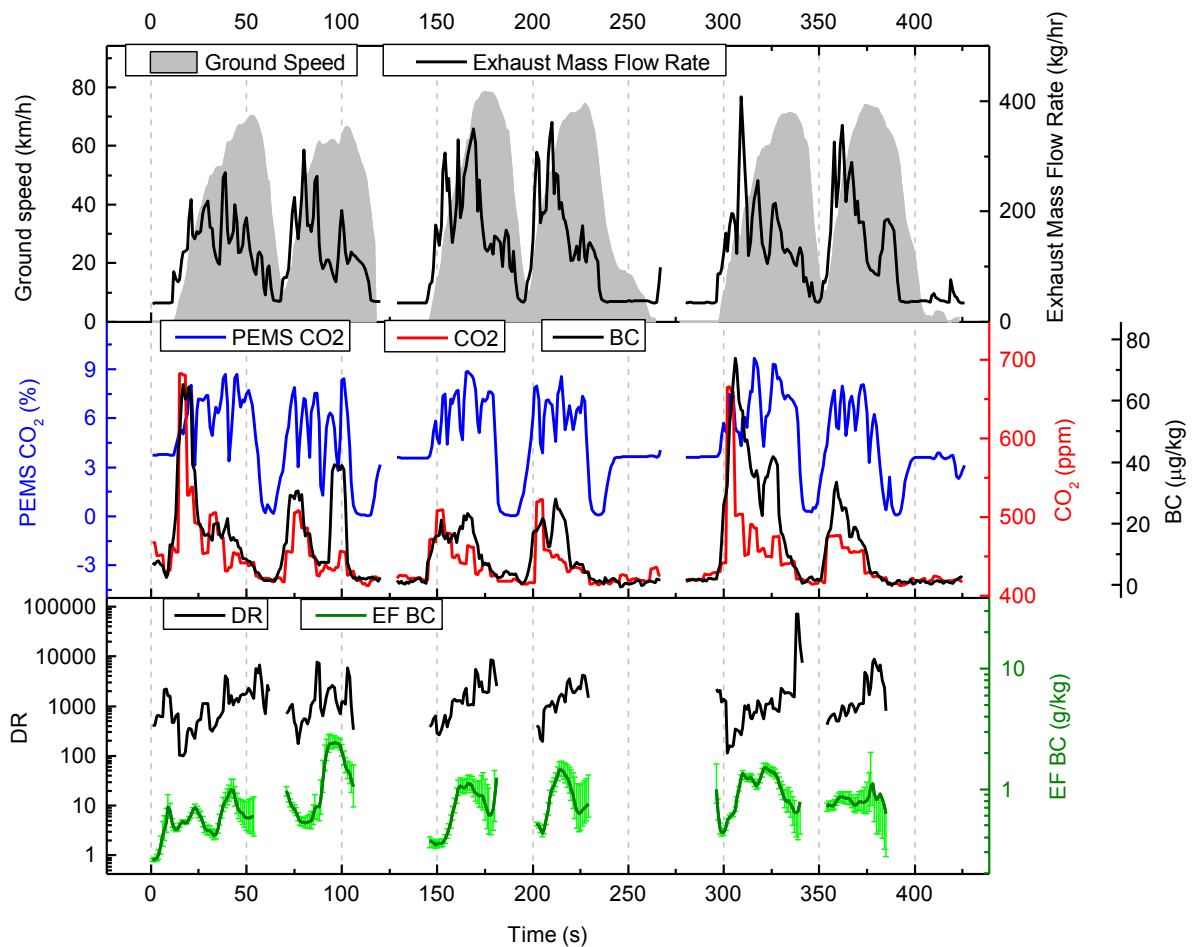

9 Figure S2. The tailpipe measurements performed with the portable emission measurement  
10 system (PEMS) are ground speed (shaded grey) and exhaust mass flow rate (black) – top; and  
11 CO<sub>2</sub> (blue) – middle. CO<sub>2</sub> and BC measured with the mobile station in red and black,  
12 respectively, also in the middle plot. The calculated dilution ratio (DR) in black and the BC  
13 EF in green – bottom. The BC EF does not show any significant dependence on the DR, and  
14 the uncertainty of EF (light green) increases when the CO<sub>2</sub> emissions are low. Note the log  
15 scales for DR and EF. Data from Ježek et al., 2015.

1 The results presented in Figure S2 first show how the exhaust mass flow rate changes with the  
2 vehicle speed for the analyzed turbocharged diesel engine. When the vehicle is accelerating,  
3 the power demand is high and so the exhaust flow rate increases and reaches the highest  
4 values at high engine speeds and loads. When the vehicle ceases to accelerate the flow rate  
5 drops; when the vehicle stops, and during certain braking sections, the engine idles and so the  
6 mass flow reach its minimum value. While driving, the concentration of CO<sub>2</sub> in the exhaust  
7 line varies from roughly 4% to 9%, and drops to zero when the vehicle is braking. The jagged  
8 exhaust flow rate and CO<sub>2</sub> measured with PEMS reflect the gear changes as the mass flow is  
9 strongly dependent on the engine speed. The variability of the exhaust flow rate is often also  
10 reflected in the CO<sub>2</sub> measurements of the mobile platform, where we can observe similar  
11 drops in the CO<sub>2</sub> signal when a gear shift is made (e.g. after 25<sup>th</sup> to 30<sup>th</sup> and 160<sup>th</sup> to 170<sup>th</sup>  
12 seconds, and so on etc.).

13 The calculated DR values range from approximately 100, when we were in closer proximity  
14 to the chased vehicle and the speed of both vehicles was lower; to the maximum value of  
15 approximately 72000 when both the emitted CO<sub>2</sub> and the exhaust mass flow rate dropped.  
16 This occurred at the end of the track where we had to slow down to make a sharp U-turn.  
17 Notwithstanding this period, the maximum DR value was 8943 and the median 1077. This is  
18 similar to the measurements of Vogt et al. (2003), where they report dilution factors measured  
19 at approximately constant distances of 14, 50 and 100 m distance from a diesel car travelling  
20 50-100 km/h to range from 926 to 9300.

21 The dilution does not affect the calculated BC EF. As we can see from Figure , the BC EF is  
22 at its highest just before the highest cruising speed is reached; and the dilution ratio is highest  
23 when the exhaust mass flow rate drops. This is consistent with the findings of Chang et al.  
24 (2009), who report that the dilution ratio depends not only on speed but also on the exhaust  
25 flow rate and other parameters, which are more important in the near wake region. The  
26 omitted parts, when the CO<sub>2</sub> drops below the background, overlap with the parts where there  
27 is little to no CO<sub>2</sub> emitted from the exhaust pipe, and so the CO<sub>2</sub> concentrations measured  
28 with the mobile station do not exceed the background level. However, the dilution rate does  
29 influence the uncertainty of the EF calculation. We can see that both the positive and the  
30 negative errors increase at the end of each run when the exhaust mass flow rate drops. We can  
31 also see that, at around the 170<sup>th</sup> second and after the 370<sup>th</sup> second, there is no positive error.  
32 This is because we do not calculate the EF when concentrations drop below the set baseline.

1 If we had high background noise and low CO<sub>2</sub> emissions coming out of the vehicle, the error  
2 produced would have been large. We have, in part, limited calculating with low CO<sub>2</sub> by  
3 calculating the running integration EF using the 10 s time integrals instead of shorter  
4 intervals.

5 We will describe the EF variation measured with its range and selected percentile values. The  
6 range describes the spread of the sample data. The percentiles divide the sample so that for the  
7  $p$ th percentile of a sample ( $p$  being a number between 0 and 100), as nearly as possible  $p\%$  of  
8 the sample values are less than the  $p$ <sup>th</sup> percentile and  $(100 - p)\%$  are greater (Navidi, 2001).  
9 For each EF time series determined using different background levels, we calculated the  
10 distribution range, and the 25<sup>th</sup>, 50<sup>th</sup> (median), 75<sup>th</sup> and 90<sup>th</sup> percentile values. In Table we can  
11 see that the negative relative error is smaller than the positive for values that are the median or  
12 higher. We can also see that the maximum value is calculated with the highest uncertainty,  
13 but that the 90<sup>th</sup> percentile uncertainty already resembles the uncertainty of the 75<sup>th</sup> percentile.  
14 This means only a maximum of 10% of the values have an uncertainty that is higher than  
15 25%. We can see that the error that arises from background determination is larger than that  
16 arising from instrument imprecision and the omission of CO and HC measurements.

17 In order to better resolve the EF variability, we have calculated the EF using a shorter  
18 integration time of 2 s. In order to calculate the 2 s integration interval we eliminated all  
19 values that were lower than the background plus two standard deviations of its variability,  
20 thereby excluding low CO<sub>2</sub> values from the calculation, which are the source of the highest  
21 EF calculation uncertainty. We can see in Table, that an integration using a shorter time  
22 interval of 2 s yields in similar EF distribution values, only the maximum emissions are  
23 substantially higher. As Ajtay et al. (2005) reported for their laboratory experiments, the  
24 emission peaks flatten on their way from the engine through the exhaust system and the  
25 sampling lines of the measuring instruments. During our measurements there is a rapid,  
26 intense dilution of exhaust emissions in the atmosphere before they reach the mobile  
27 measurement platform. Even by integrating with shorter time interval we can only capture  
28 only a smoothed version of the emission peak. Since the uncertainty of such a calculation is  
29 rather high, we use the 10 s integration, which thus reflects an even more smoothed version of  
30 the super emission peaks produced by the engine.

31

32



1 Table T1. The emission factor (EF) calculated using different background levels shows that  
 2 regardless of the set background, the EF distributions yield similar percentile values. The +  
 3 and - signs denote the EF calculated using the background with subtracted 2 standard  
 4 deviations of its variability (EF BC-), and from the background with added 2 standard  
 5 deviations of its variability (EF BC+). Their positive and negative relative errors (rel. err.) are  
 6 also reported. In the last column is the EF is calculated with a 2 s integral instead of a 10 s  
 7 integral.

|                             | EF BC-<br>(g/kg) | <b>EF BC</b><br><b>(g/kg)</b> | EF BC+<br>(g/kg) | -Rel err.<br>(%) | +Rel err.<br>(%) | <b>EF BC 2 s</b><br><b>(g/kg)</b> |
|-----------------------------|------------------|-------------------------------|------------------|------------------|------------------|-----------------------------------|
| Minimum                     | 0.24             | 0.23                          | 0.23             | -0.04            | 0.00             | 0.14                              |
| 25 <sup>th</sup> percentile | 0.50             | 0.55                          | 0.59             | 0.09             | 0.07             | 0.49                              |
| <b>Median</b>               | <b>0.63</b>      | <b>0.73</b>                   | <b>0.88</b>      | <b>0.14</b>      | <b>0.21</b>      | <b>0.73</b>                       |
| 75 <sup>th</sup> percentile | 0.85             | 1.01                          | 1.25             | 0.16             | 0.24             | 1.15                              |
| 90 <sup>th</sup> percentile | 1.17             | 1.35                          | 1.69             | 0.13             | 0.25             | 1.65                              |
| Maximum                     | 1.99             | 2.44                          | 3.54             | 0.18             | 0.45             | 5.14                              |

8

9

10

1 **Supplementary material S4 – EF figures in linear scale**

2

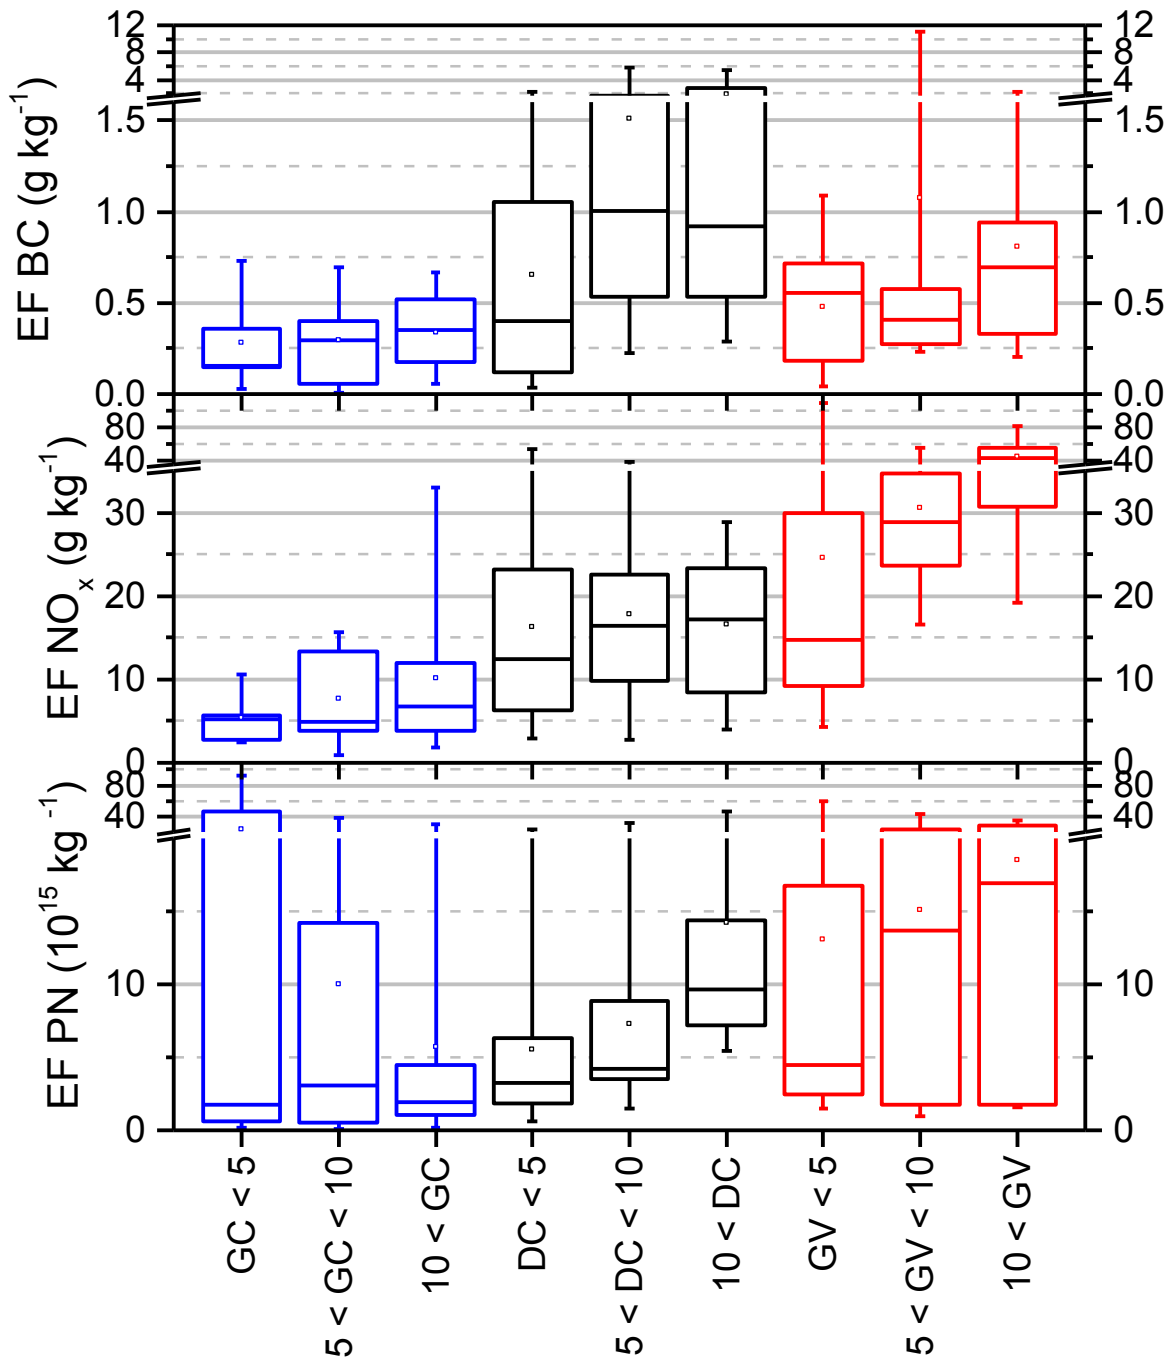

3

4 Figure S3. BC and NO<sub>x</sub> EF according to different vehicle categories and age group  
5 subcategories: gasoline passenger cars (GC, blue), diesel passenger cars (DC, black), and  
6 goods vehicles (GV, red). Note the EF linear scale; same figure in logarithmic scale can be  
7 found as Figure 3.

8

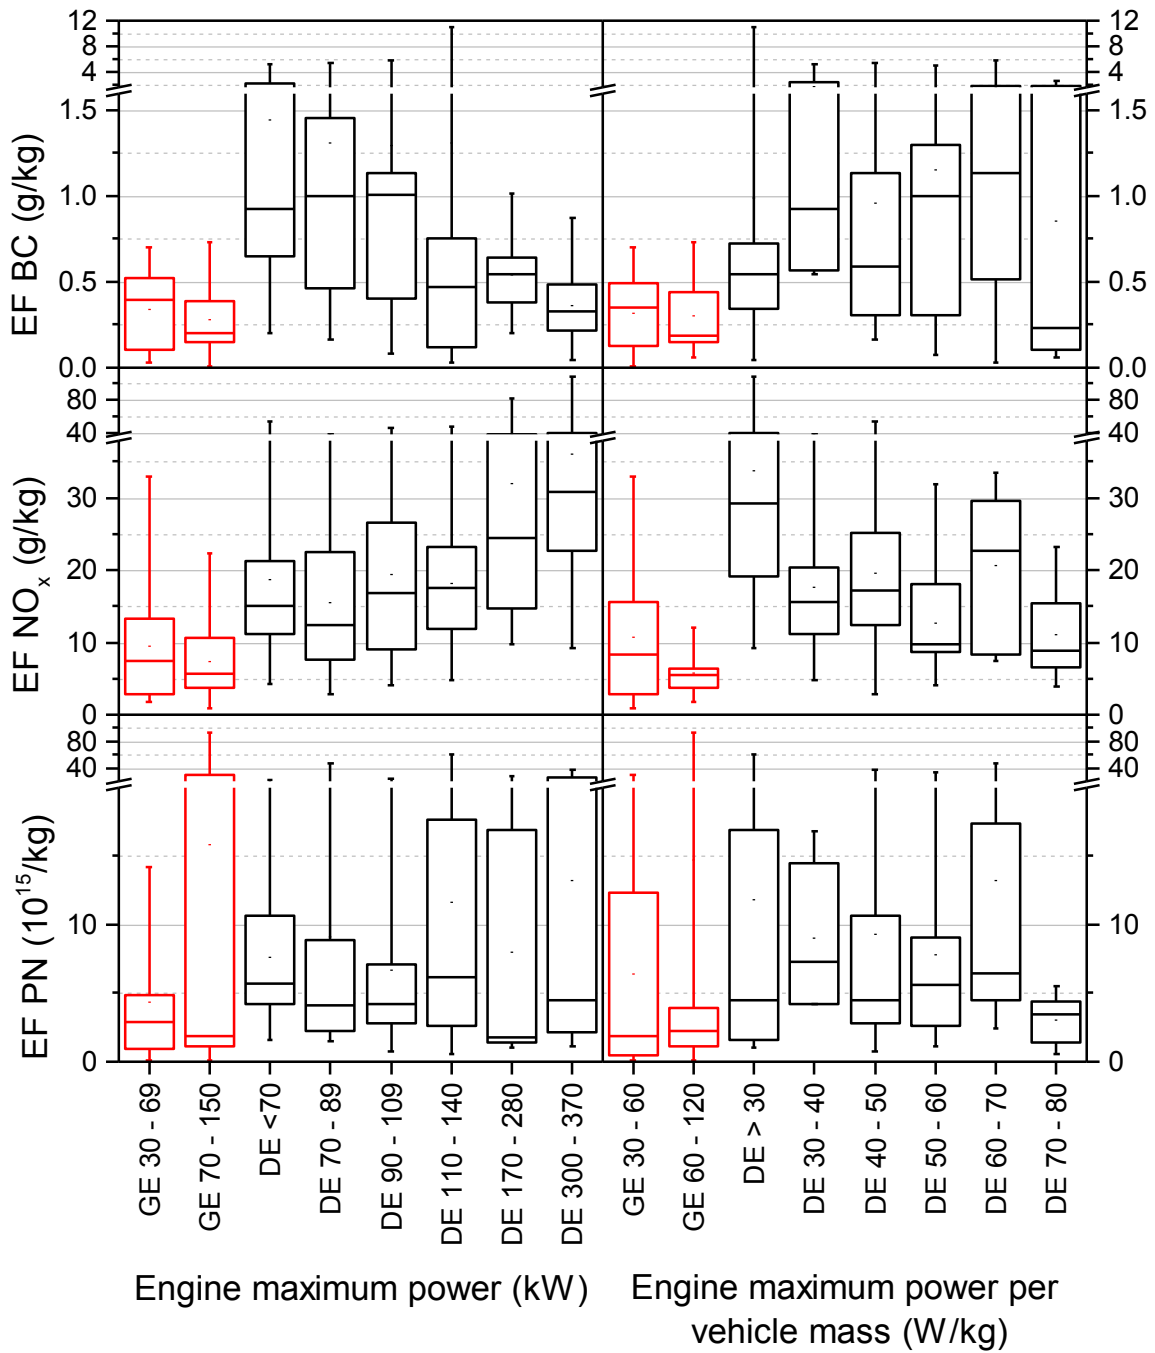

1

2 Figure S4. BC and NO<sub>x</sub> EFs according engine power (left) and size (right); red boxes present  
 3 gasoline engines (GE) and black boxes present all diesel engines (DE) regardless of their  
 4 vehicle category. Note the EFs are on logarithmic scale; same figure in logarithmic scale can  
 5 be found as Figure 4.

6

## 1 **References**

- 2 ACEA: The Automobile Industry Pocket Guide, ACEA Commun. Dep., 2012.
- 3 Ajtay D, Weilenmann M and Soltic P.: Towards accurate instantaneous emission models  
4 Atmos. Environ., 39 (13), 2443–2449, doi:10.1016/j.atmosenv.2004.03.080, 2005.
- 5 Chang V. W. C., Hildemann L. M. and Chang C.: Dilution rates for tailpipe emissions: effects  
6 of vehicle shape, tailpipe position, and exhaust velocity, J. Air Waste Manag. Assoc. 59, 715–  
7 724, 2009.
- 8 Dockery, D. W., Pope, C. A., Xiping, X., Spengler, J. D., Ware, J. H., Fay, M. E., Ferris, B. J.  
9 and Speizer, F. E.: An association Between Air Pollution and Mortality in Six U.S. Cities, N.  
10 Engl. J. Med., 329, 1759, 1993.
- 11 European Parliament: Regulation (EC) No. 715/2007 of the European Parliament and of the  
12 Council of 20 June 2007 on type approval of motor vehicles with respect to emissions from  
13 light passenger and commercial vehicles (Euro 5 and Euro 6) and on access to vehicle repair  
14 and ma, Off. Journal Eur. Union, 171, 1–16, 2007.
- 15 Harrison, R.M., Brimblecombe, P., and Derwent, R.G.: Airborne Particulate Matter in the  
16 United Kingdom. Third report of the Quality of Urban Air Review Group, Department of the  
17 Environment, London, 47, 38-130, 1996.
- 18 Heywood, J. B.: Internal Combustion Engine Fundamentals, McGraw-Hill Inc., 1988.
- 19 Ježek, I., Drinovec, L., Ferrero, L., Carriero, M. and Močnik, G.: Determination of car on-  
20 road black carbon and particle number emission factors and comparison between mobile and  
21 stationary measurements, Atmos. Meas. Tech., 8, 43–55, doi:10.5194/amt-8-43-2015, 2015.
- 22 Kennedy, I. M.: The health effects of combustion-generated aerosols, Proc. Combust. Inst., 31  
23 II, 2757–2770, doi:10.1016/j.proci.2006.08.116, 2007.
- 24 Kittelson, D. B.: Engines and nanoparticles : a review, J. Aerosol Sci., 29(5), 575–588, 1998.
- 25 Kittelson, D., Watts, W. and Johnson, J.: On-road and laboratory evaluation of combustion  
26 aerosols—Part1: Summary of diesel engine results, J. Aerosol Sci., 37, 913–930, 2006.
- 27 Navidi W.: Statistics for engineers and scientists, vol 40, eds. D B Hash and L Neyens (New  
28 York: McGraw-Hill), 2001.
- 29 Sharma, M., Kumar, A. and Bharathi, K. V. L.: Characterization of exhaust particulates from  
30 diesel engine, Atmos. Environ., 39, 3023–3028, doi:10.1016/j.atmosenv.2004.12.047, 2005.
- 31 Tavčar, G., Bizjan, F. and Kutrašnik, T.: Methods for improving transient response of diesel  
32 engines - influences of different electrically assisted turbocharging topologies, Proc. Inst.  
33 Mech. Eng. Part D J. Automob. Eng., 225(9), 1167–1185, doi:10.1177/0954407011414461,  
34 2011.

- 1 Vogt R., Scheer V., Casati R. and Benter T.: On-road measurement of particle emission in the
- 2 exhaust plume of a diesel passenger car, *Environ. Sci. Technol.*, 37, 4070–4076, 2003.
  
- 3 Xi, J. and Zhong, B.-J.: Soot in Diesel Combustion Systems, *Chem. Eng. Technol.*, 29(6),
- 4 665–673, doi:10.1002/ceat.200600016, 2006.
